# Supplementary material for: Wnt regulates amino acid transporter Slc7a5 and so constrains the integrated stress response in mouse embryos
Source: PubMed Central journal article supplement (PMC6944906; doi:10.15252/embr.201948469), 2019-12-02
Supplement: EMBR-21-e48469-s001.pdf [file EMBR-21-e48469-s001.pdf]

## Appendix Figures and Tables

### Contents

**Page 2**

**Appendix Figure S1** Validation of specificity of *Slc7a5* mRNA probe

**Page 3**

**Appendix Figure S2** pS6 detection comparing antibodies against p-Ser 235/236 and pSer 240-244

**Page 4**

**Appendix Figure S3** Transcription and protein levels of *Slc7a5* partner *Slc3a2*/CD98 are not reduced in *Slc7a5*-null embryos

**Page 5**

**Appendix Figure S4** Notch signalling is unaffected in *Slc7a5*-null embryos

**Page 6**

**Appendix Figure S5** Expression of genes involved in the thyroid hormone response were unchanged in *Slc7a5*-null embryos and thyroid hormone receptors mRNA levels rise after E11.5 in wildtype embryos

**Page 7**

**Appendix Figure S6** Exposure to known ER stressors Tunicamycin and Thapsigargin induces localised expression of *Trib3* and *Chac1*

**Page 8**

**Appendix Figure S7** *Chac1* and *Trib3* transcripts are just detectable in E8.5 wildtype embryos

**Page 9**

**Appendix Table S1** Sequence of the primers used to generate in situ hybridization probes specific for the murine *Slc7a5*, *Slc3a2*, *Chac1* and *Trib3*

**Page 10**

**Appendix Table S2** Sequence of the primers used for qPCR

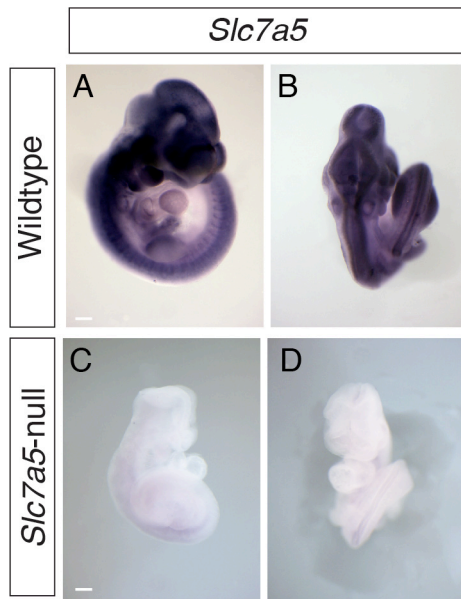**Appendix Figure S1 Validation of specificity of *Slc7a5* mRNA probe**

In situ hybridisation for *Slc7a5* mRNA in (A, B) wildtype and (C, D) *Slc7a5*-null embryos. Two whole litters including n=3 mutant embryos were assessed for *Slc7a5* expression. All embryos in each litter were processed in parallel and the BCIP/NBT reaction stopped at the same time for all embryos: while strong expression of *Slc7a5* was detected in littermates, all *Slc7a5*-null embryos lacked transcripts, consistent with RNA-seq data comparing wildtype and *Slc7a5*-null embryos. Scale bar 200  $\mu$ m.

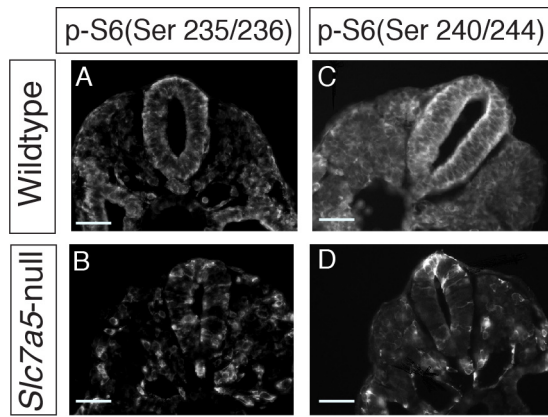

#### Appendix Figure S2 pS6 detection comparing antibodies against p-Ser 235/236 and pSer 240-244

The patterns of pS6 detection with an antibody recognising p-Ser 235/236 in (A) wildtype and (B) *Slc7a5*-null embryo neural tube (n=5, 18 sections and n=8, 24 sections, respectively, as in Figure 4) were found to be similar to those detected with an antibody recognising pSer 240-244 (a site specifically phosphorylated by mTORC1) in (C) wildtype and *Slc7a5*-null (D) embryos ( n=1 embryo, 11 sections; n=2 embryos, 9 and 11 sections respectively). Note both antibodies reveal an aberrant /reduced pattern of pS6 in mutant embryos. Scale bar 50µm.

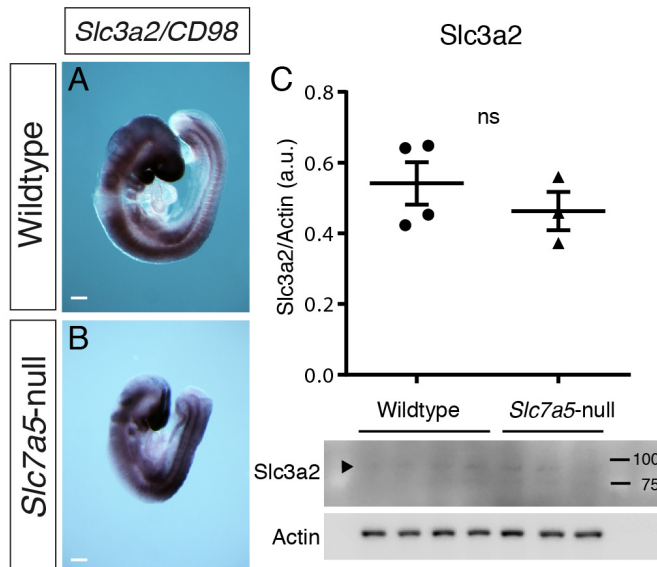

#### Appendix Figure S3 Transcript and protein levels of Slc7a5 partner Slc3a2/CD98 are not reduced in Slc7a5-null embryos

mRNA in situ hybridization was undertaken to determine whether expression of Slc7a5 partner *Slc3a2/CD98* is reduced in *Slc7a5*-null embryos. *Slc3a2* was cloned (sequence from NM\_001161413.1 and probe generated for region 920-1922 - 3' end of coding sequence). *Slc3a2* transcripts were assessed in *Slc7a5*-null (n=3) and heterozygote (n=2) and wildtype (n=2) embryos at E9.5, when the phenotype is apparent. This revealed strong *Slc3a2* expression in all embryos, including (A) wildtype and (B) *Slc7a5*-null embryos, intriguingly the *Slc3a2* pattern of expression is similar to that of *Slc7a5*, Scale bars 200  $\mu$ m. (C) Western blotting was used to evaluate levels of Slc3a2 protein in wildtype (n=4) and *Slc7a5*-null (n=3) embryos. Each lane contains lysate from one embryo and expression in each embryo is represented by a dot or triangle, actin is the loading control and error bars indicate SEM.

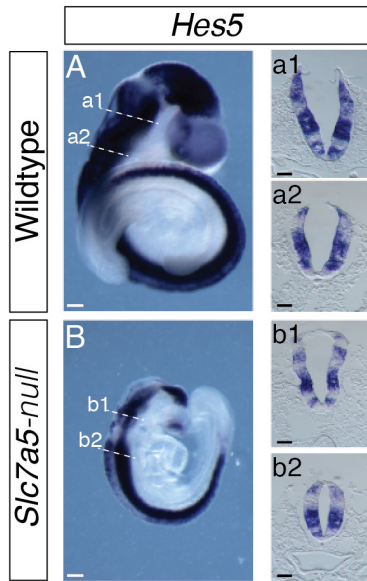

**Appendix Figure S4 Notch signalling is unaffected in *Slc7a5*-null embryos**

Expression of notch signalling target *Hes5* was assessed by mRNA in situ hybridization in wildtype littermate (A) and *Slc7a5*-null (B) E9.5 embryos (n=2 each). Panels (a1 – b2) show transverse sections of the dorsal neural tube at the level of the hindbrain (a1, b1) or the spinal cord (a2, b2). Scale bars 200  $\mu\text{m}$ , except for sections 50  $\mu\text{m}$ .

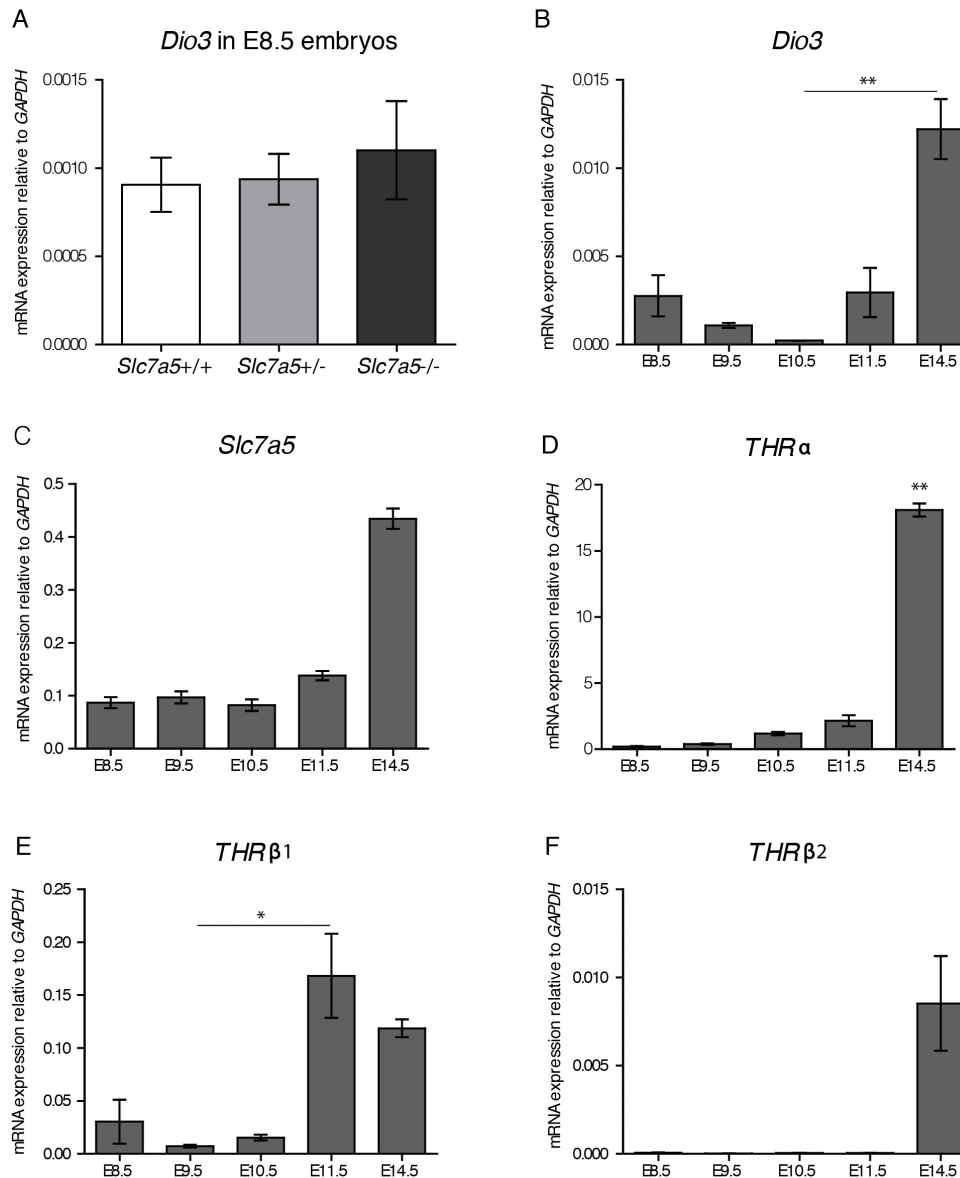

**Appendix Figure S5 Expression of genes involved in the thyroid hormone response were unchanged in *Slc7a5*-null embryos and thyroid hormone receptor mRNA levels rise after E11.5 in wildtype embryos**

The expression of enzyme type III iodothyronine deiodinase (*Dio3*) is T3 responsive (Bianco and Kim 2006) but was not significantly changed in RNAseq data. (A) This was confirmed using qPCR on wildtype and *Slc7a5*-deficient E8.5 embryos (n=5).

(B-F) qPCR analysis was performed on wildtype embryos at various developmental stages (n=3, except for E9.5 (n=4) using primers specific for (B) *Dio3*, (C) *Slc7a5* or (D, E, F) thyroid hormone receptors *THR*.

Data information: Error bars indicate SEM. (B-F) A one-way Anova test was performed for statistical analysis \*p<0.05, \*\*p<0.01. Actual p values for all comparisons are in original source data.

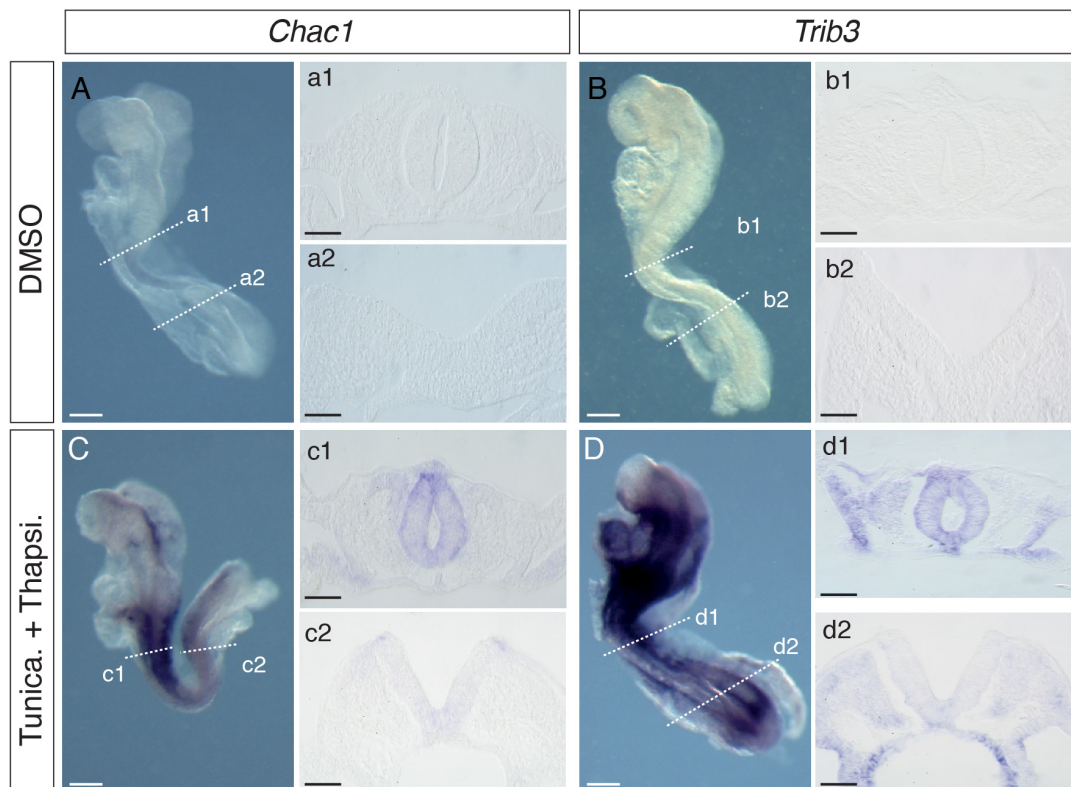

**Appendix Figure S6 Exposure to known ER stressors Tunicamycin and Thapsigargin induces localised expression of *Trib3* and *Chac1***

Tunicamycin and Thapsigargin act respectively by inhibition of protein glycosylation or reduction of activity of calcium-dependent ER chaperones (Kuo & Lampen, 1974, Thastrup, Cullen et al., 1990). Exposure to either of these drugs leads to accumulation of unfolded proteins in the ER, which provokes ER stress (Osowski & Urano 2011). Whole E8.5 embryos were suspended in hanging drop culture for 6 hours in the presence of control carrier DMSO or Tunicamycin and Thapsigargin. All embryos were harvested and processed in parallel for mRNA in situ hybridization (n=3 embryos in each condition and for each gene assessed). *Chac1* and *Trib3* transcripts were undetectable in control DMSO-only treated embryos (Figures A,B), but strongly upregulated following Tunicamycin and Thapsigargin treatment, particularly in the forming neural tube (Figures C-c2, D-d2). These data directly link increased expression of *Chac1* and *Trib3* to an ER stress response in the developing mouse embryo and show that at this early stage the developing neural tube is particularly vulnerable to such stress. Scale bars 200  $\mu\text{m}$ , except for sections 100  $\mu\text{m}$ .

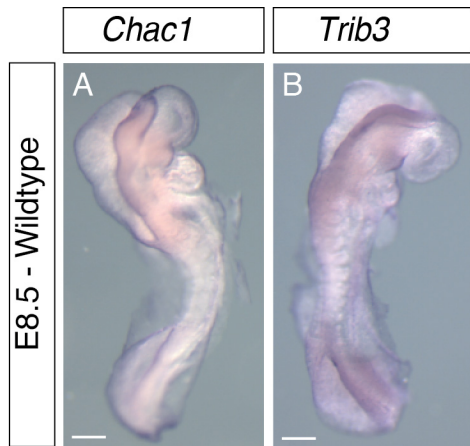

**Appendix Figure S7 *Chac1* and *Trib3* transcripts are just detectable in E8.5 wildtype embryos**

(A) *Chac1* and (B) *Trib3* expression pattern in wildtype E8.5 embryos after >6 days in situ hybridisation reaction (n=4 for each gene). Scale bars 200  $\mu$ m.



**Appendix Table S1** Sequence of the primers used to generate in situ hybridization probes specific for the murine *Slc7a5*, *Slc3a2*, *Chac1* and *Trib3*

| Gene name          | FASTA sequence | Forward primer       | Reverse primer       | product length |
|--------------------|----------------|----------------------|----------------------|----------------|
| <i>Slc7a5/Lat1</i> | NM_011404.3    | GCAATATCACGCTGCTCAAC | CCAAGTGGTAGTCCCGAAG  | 831            |
| <i>Chac1</i>       | NM_026929.4    | CAAGCCCTGTGGATTTTCGG | GCGGGGCATAAGACACAAAG | 716            |
| <i>Trib3</i>       | NM_175093.2    | CTTTAGCAGCGGAAGAGGCT | CTGAAGACAAAGCGACGCAG | 714            |
| <i>Slc3a2</i>      | NM_001161413.1 | GGGCTCCCAGGAAGATTTTA | TCAGGTTTTCCAGCTTCAGG | 1002           |

Appendix Table S2 Sequence of the primers used for qPCR

| Gene name                       | FASTA sequence | Forward primer          | Reverse primer           | product length |
|---------------------------------|----------------|-------------------------|--------------------------|----------------|
| <i>Aldh1L2</i>                  | NM_153543.2    | TAACACCTACAACAAGACAGAC  | GTATTCATTCAGGGCCTCCTCA   | 96             |
| <i>ATF4</i>                     | NM_009716.3    | AGCAAAACAAGACAGCAGCC    | ACTCTCTTCTTCCCCCTTGC     | 193            |
| <i><math>\beta</math>-Actin</i> | NM_007393.3    | ATGCTCCCCGGGCTGTAT      | CATAGGAGTCCTTCTGACCCATTC | 87             |
| <i>CD98</i>                     | NM_008577.4    | GAGGACAGGCTTTTGATTGC    | ATTCAGTACGCTCCCCAGTG     | 136            |
| <i>Chac1</i>                    | NM_026929.4    | AGTGTGGAAGCCGGACTTTG    | CACTCGGCCAGGCATCTTGT     | 121            |
| <i>CHOP</i>                     | NM_007837.4    | CCACCACACCTGAAAGCAGAA   | GGTGCCCCAATTCATCT        | 150            |
| <i>Dio3</i>                     | NM_172119.2    | TCAGACGACAACCGTCTGTG    | AAAATTGAGCACCAACGGGC     | 189            |
| <i>Fanca</i>                    | NM_016925.3    | CGGGCAGAGTCAAAAAGCAA    | AGCAGAGCGGATGAAGGAAG     | 212            |
| <i>GAPDH</i>                    | NM_001289726.1 | TGTGTCCGTCGTGGATCTGA    | CCTGCTCACCACCTTCTTGA     | 77             |
| <i>Klhdc4</i>                   | NM_145605.2    | CGGAAGGAGGAGGAAGACCT    | TCACCTCCGAAAAGGATCAGC    | 164            |
| <i>Lefty2</i>                   | NM_177099.3    | GGACCTGGAGCGCACAC       | GGGTCACAATTGCCTTGAGC     | 133            |
| <i>Nodal</i>                    | NM_013611.4    | CCATGCCTACATCCAGAGCCTGC | TGGTGTTCAGGAGGACCCTGCC   | 132            |
| <i>Pck2</i>                     | NM_028994.2    | CGGCTGGAGTTCGAGACTTT    | GGGCCAGCCAGCAGTTCTTA     | 165            |
| <i>Slc7a5</i>                   | NM_011404.3    | CTGGTCTTCGCCACCTACTT    | GCCTTTACGCTGTAGCAGTTC    | 128            |
| <i>Spire2</i>                   | NM_172287.2    | TGGAGCCCGAGCCTACAAC     | CTCTTCTGGACCCACGTAGC     | 227            |
| <i>THR<math>\alpha</math></i>   | NM_178060.3    | CCTGGACAAAGACGAGCAGT    | GCACTGATTCCGGGTGATCT     | 184            |
| <i>THR<math>\beta</math>1</i>   | NM_001113417.1 | GGACAAGCACCCATCGTGAAT   | CTCTGGTAATTGCTGGTGTGAT   | 97             |
| <i>THR<math>\beta</math>2</i>   | NM_009380.3    | CCTGTAGTTACCTGGAAACCTG  | GGCTTTGTCCCCACACACTA     | 200            |
| <i>Trib3</i>                    | NM_175093.2    | TCTCCTCCGCAAGGAACCT     | TCTCAACCAGGGATGCAAGAG    | 67             |
