# Supplementary material for: Wnt regulates amino acid transporter Slc7a5 and so constrains the integrated stress response in mouse embryos
Source: PubMed Central journal article supplement (PMC6944906; doi:10.15252/embr.201948469), 2019-12-02
Supplement: EMBR-21-e48469-s002.pdf [file EMBR-21-e48469-s002.pdf]

## Expanded View Figures

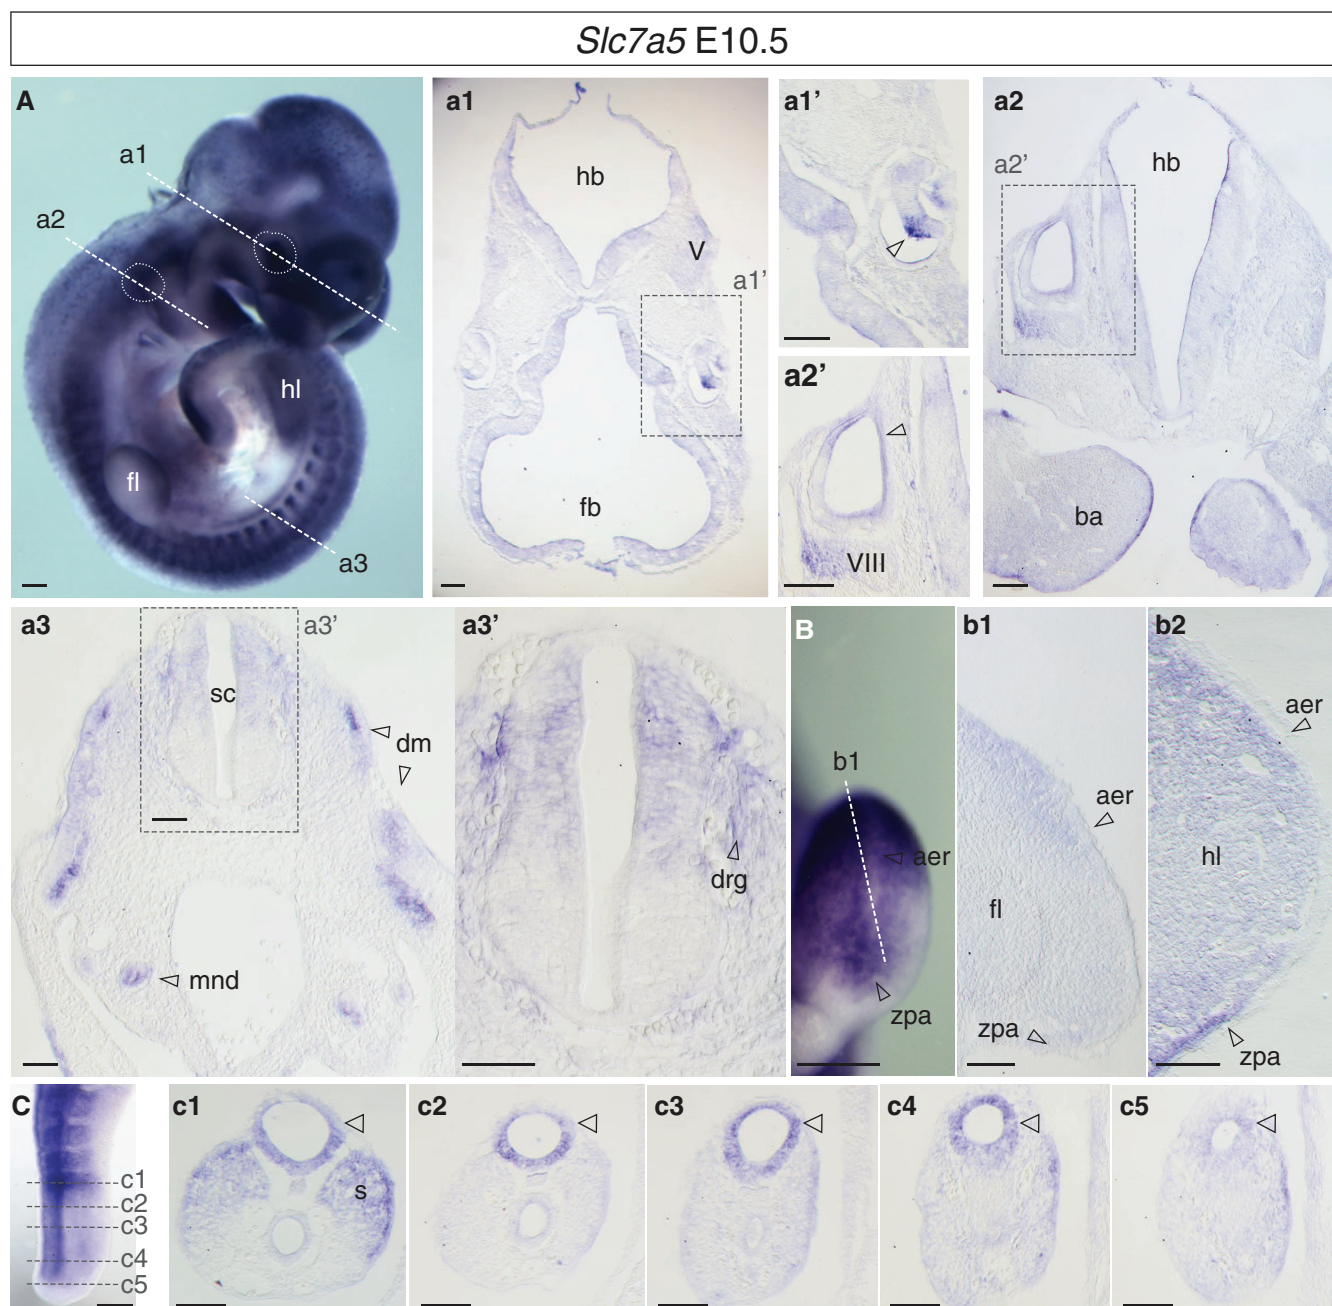

**Figure EV1. *Slc7a5* mRNA expression pattern in E10.5 mouse embryo.**

A E10.5 whole embryo side view and TSs (white dashed lines) showing expression in: (a1) forebrain (fb) and (a1') optic vesicle, including regions of retina (open arrowhead) and lens; (a1, a2) hindbrain (hb), trigeminal ganglion (V) and (a2') otic vesicle and vestibule-cochlear ganglion (VIII) and first branchial arch (ba); (a3, a3') dorsal spinal cord (sc), dorsal root ganglia (drg), dermamyotome (dm), mesonephric duct (mnd).

B Forelimb bud (fl) (b1) and hindlimb bud (hl) (b2) in mesenchyme below the apical ectoderm ridge (aer) and in the zone of polarising activity (zpa).

C Forming somite (s) and secondary neural tube (white arrowhead).

Data information: Images representative of  $n = 4$  embryos, scale bars 200  $\mu\text{m}$  except for sections 100  $\mu\text{m}$ .

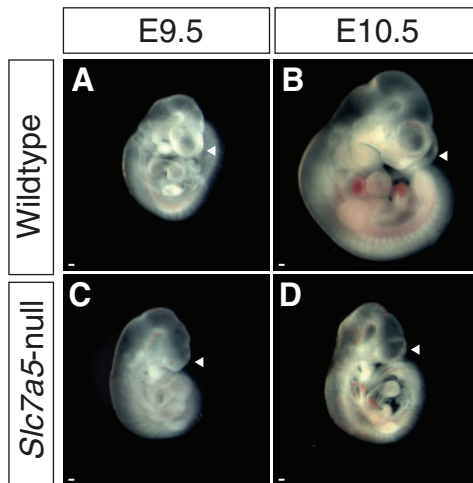

**Figure EV2.** A small subset of *Slc7a5*-null embryos exhibits a “flat-top-like” phenotype.

A–D Wild-type littermate (A and B) and *Slc7a5*-null embryos (C and D) were imaged at E9.5 (A and C) or E10.5 (B and D). A subset of *Slc7a5*-null embryos (~ 11%, 4/35 null embryos at E9.5 and 1/6 null embryos at E10.5) shows a “flat-top”-like phenotype with no expansion of the forebrain as described in [27] (see arrowheads). Scale bars 200  $\mu$ m.

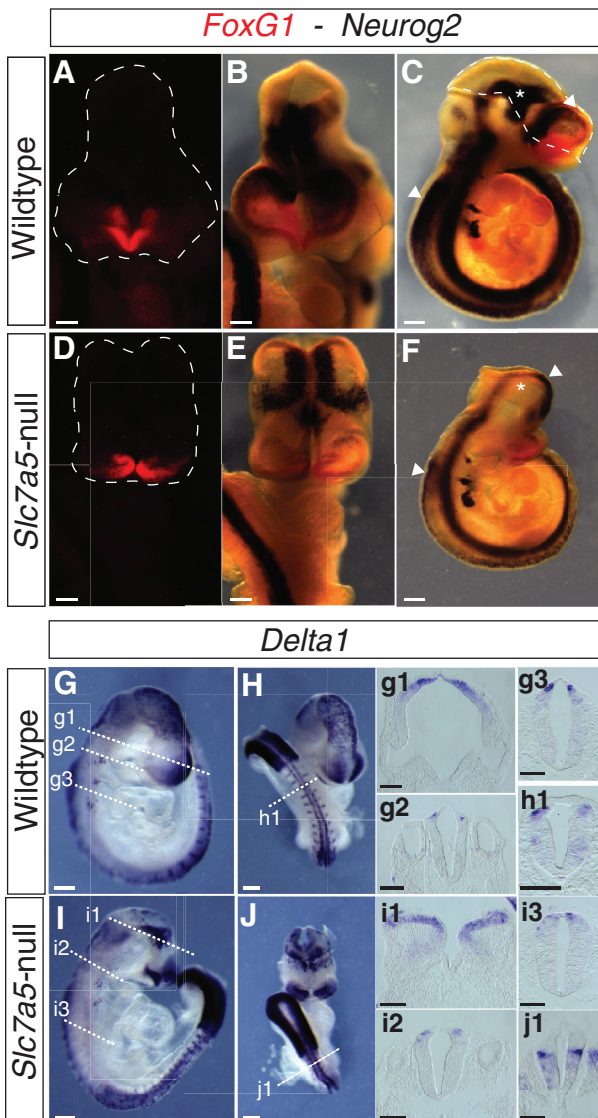

**Figure EV3.** *Slc7a5*-null embryos exhibit altered expression patterns of key neurogenesis genes.

A–F mRNA *in situ* hybridisation in E9.5 wild-type and *Slc7a5*-null embryos for neurogenesis marker genes. *FoxG1* and *Neurog2* double *in situ* hybridisation in E9.5 (A–C) wild-type and (D–F) *Slc7a5*-null embryos ( $n = 2$  each for double *FoxG1/Neurog2*, a further  $n = 3$  *Slc7a5*-null and  $n = 2$  wild-type embryos) were assessed for *Neurog2* expression in wholemount and sections. Images in (A and D) show frontal view of *FoxG1* mRNA detected with fast red (white dotted lines indicate shape of the head). Expression of *FoxG1* in rostral-most forebrain was detected in *Slc7a5*-null embryos with similar intensity but in a reduced domain when compared to wild type. This suggests that *Slc7a5* loss does not disrupt brain regionalisation, but leads to a reduction in the amount of tissue and/or failure of morphogenetic events underlying neural tube closure [31]. (B–F) To determine whether neurogenesis was affected in *Slc7a5*-null embryos, we assessed the expression pattern of *Neurogenin-2* (*Neurog2*), a neural progenitor marker [32]. Widespread reduction in *Neurog2* expression was apparent in whole *Slc7a5*-null embryos (E, F); some *Neurog2*-positive cell populations were represented in reduced domains (arrowheads in C, F), while others were absent (asterisk in C, F) (dotted line on the wild-type embryo (C) indicates regions of fore- and midbrain not apparent in the *Slc7a5*-null embryo).

G–J *Delta1*, a marker of newborn neurons [33], was detected in (G, H) wild type and (I, J) *Slc7a5*-null E9.5 ( $n = 3$  each) in fore- and midbrain but showed a distorted pattern in null embryos due to neurulation failure; TSs through (g1, i1) the forebrain, (g2, i2) at the level of the otic vesicles, (g3, i3) posterior hindbrain and (h1, j1) spinal cord show reduction of the dorsally located *Delta1*-expressing cells in the *Slc7a5*-null embryos. Scale bars 200  $\mu$ m, except sections 100  $\mu$ m.

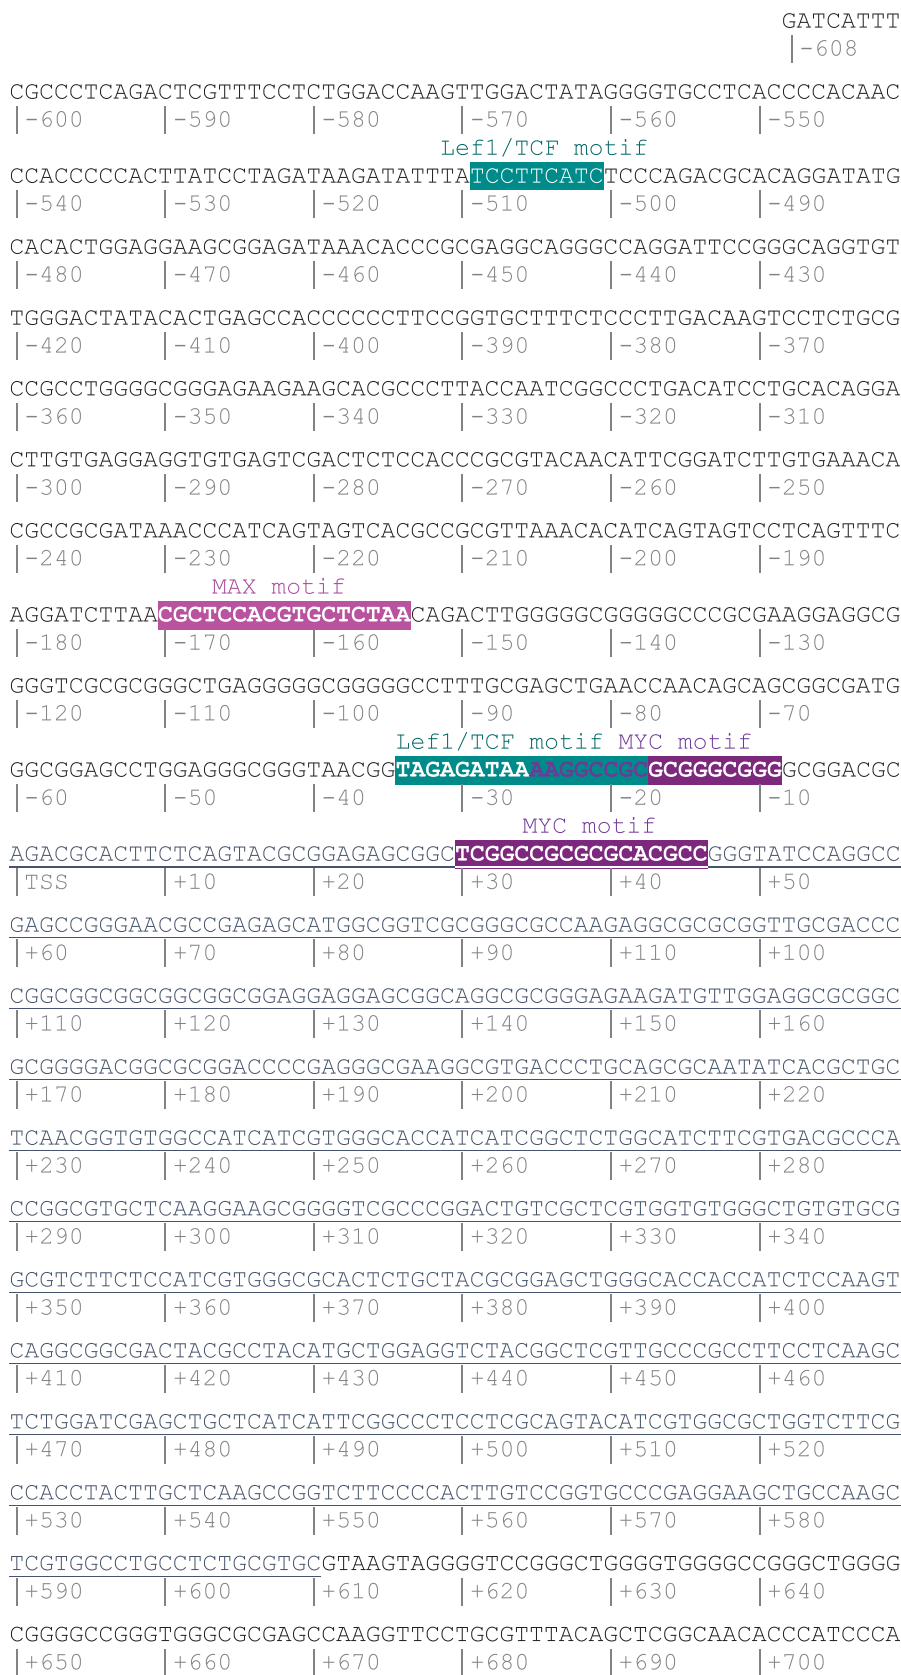

**Figure EV4. Position and sequence of MYC and LEF/TCF binding sites in *Slc7a5* promoter region.**

Analysis of the -1,075 to +352 bp sequence of the *Slc7a5* mouse gene with the MatInspector program [61] identified putative MYC binding sites at positions TSS -9/-25 and +30/+46 (with a matrix similarity comprised between 0.925 and 0.931). A further MYC/MAX binding site, similar to the MYC binding E-box motif identified in human *Slc7a5* promoter [19], was found at -TSS -154/-170. A potential LEF/TCF binding motif (sequence tagagataAAGgccgc) at position -18/-34 from the transcription starting site. It showed a matrix similarity of 0.903 (see Dataset EV3). This motif was also found by analysing the -1,000 to +100 bp sequence of murine *Slc7a5*, using the eukaryotic promoter database (<http://epd.vital-it.ch/>) which is based on the JASPAR CORE 2018 vertebrate database [108]. Another motif was found at position -505 with the cut-off value set at  $P \leq 0.001$ . Both sites were highlighted on the murine *Slc7a5* gene sequence based on position and matrix similarity.

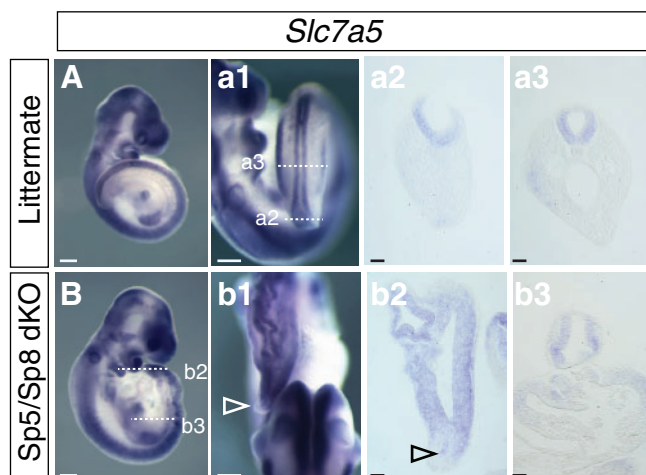

**Figure EV5. Expression of *Slc7a5* in *Sp5/Sp8* double-mutant embryos.**

A, B *Slc7a5* is expressed to the caudal tip of the *Sp5/Sp8* double knockout embryos despite failure to form paraxial mesoderm. (A, a1) *Slc7a5* expression in littermate control, (a2, a3) in TS, and (B, b1) in *Sp5/Sp8* double knockout (dKO) embryo, (b2, b3) in TS ( $n = 5/5$  mutant embryos and  $n = 3/3$  littermate controls). Open arrowheads indicate posterior neural tube. Scale bars 200  $\mu\text{m}$ , except sections 50  $\mu\text{m}$ .
